Acknowledgment of Reviewers

## Acknowledgment of Reviewers

Scientific progress depends on the generosity of reviewers who assist editors by sharing their time and expertise in the peer review process. S. Duke Han, PhD, Editor-in-Chief of the Psychological Sciences Section of *The Journal of Gerontology, Series B: Psychological Sciences and Social Sciences*, wishes to thank the following persons for their assistance in reviewing at least one manuscript during 2023.

|                      |                       |                                |                        |
|----------------------|-----------------------|--------------------------------|------------------------|
| Adjei, Naomi         | Cerino, Eric          | Edwards, Jerri                 | Henry, Julie           |
| Aichele, Stephen     | Cespón, Jesús         | Eibich, Peter                  | Hess, Thomas           |
| Albert, Steven       | Chan, Athena C. Y.    | Eli, Buzohre                   | Hicks Patrick, Julie   |
| Allard, Eric         | Chandler, Kelly       | Erickson, Alexander J.         | Hilpert, Peter         |
| Altintas, Emin       | Charness, Neil        | Falck, Ryan                    | Hiscock, Merrill       |
| Andel, Ross          | Chasteen, Alison      | Falzarano, Francesca           | Hoffman, Yaakov        |
| Anderson, Nicole     | Cheavens, Jennifer    | Felt, John                     | Höhne, Jan Karem       |
| Arbel, Ifah          | Chen, He              | Fields, Eric                   | Holtzman, Nicholas     |
| Ardelt, Monika       | Chen, Liang-Kung      | Fingerman, Karen               | Hong, Yinglu           |
| Arevalo, Sandra      | Chen, Ping            | Fiske, Amy                     | Hooker, Karen          |
| Bailey, Phoebe       | Cherbuin, Nicolas     | Flatt, Jason                   | Hoppmann, Christiane   |
| Baldwin, Tamika      | Cherry, Katie         | Ford, Jaclyn                   | Horta, Marilyn         |
| Balsis, Steve        | Chiew, Kimberly       | Freed, Sara                    | Horton, William        |
| Barnes, Lisa         | Cho, Isu              | Fung, Helene                   | Huang, Alison          |
| Baroni, Irene        | Chu, Li               | Gallego-Alberto, Laura         | Hubner, Sarah          |
| Bayat, Sayeh         | Cichy, Kelly          | Gan, Daniel                    | Hughes, Colleen        |
| Beadle, Janelle      | Clark, Alexandra      | Garo-Pascual, Marta            | Hülür, Gizem           |
| Benwell, Christopher | Coco, Moreno          | Garrido, Melissa               | Huo, Meng              |
| Bernstein, John      | Cohn-Schwartz, Ella   | Gatz, Margaret                 | Hurt, Catherine        |
| Berry, Jane          | Compernelle, Ellen    | Gazes, Yunglin                 | Huxhold, Oliver        |
| Best, Ryan           | Coogan, Patricia      | Gehrt, Tine                    | Hyun, Jinshil          |
| Bherer, Louis        | Corley, Samantha      | Gerstorff, Denis               | Infurna, Frank         |
| Bibbo, Jessica       | Cortese, Michael      | Giannakopoulos,<br>Panteleimon | Jarosz, Ewa            |
| Bielak, Allison      | Cosentino, Stephanie  | Gifford, Angela                | Jawadi, Sagrika        |
| Bolling, S. Alison   | Costa, Amy            | Goh, Joshua                    | Ji, Liying             |
| Bookwala, Jamila     | Crane, Breanna        | Gong, Xianmin                  | Jiang, Da              |
| Boron, Julie         | Crawford, Jennifer    | Graham, Eileen                 | Jiang, Jiefeng         |
| Brantley, Mia        | Cunha, Vanessa        | Gray, Margeaux                 | Jiménez-Gonzalo, Lucía |
| Brennan, Penny       | Daley, Ryan           | Greene, Nathaniel              | Johnson, Kimson        |
| Britt, Katherine     | Davidson, Patrick     | Gross, Alden                   | Joly-Burra, Emilie     |
| Brown, Colette       | Davis, Rebecca        | Growney, Claire                | Jordão, Magda          |
| Brown, Susan         | Davranche, Karen      | Gu, Yaodong                    | Joshi, Divya           |
| Bryant, Christina    | De Liema, Marguerite  | Guest, Marc                    | Jylhä, Marja           |
| Burnes, David        | de Paula Couto, Clara | Haas, Maximilian               | Kail, Ben              |
| Burns, Shane         | Deason, Rebecca       | Halfmann, Kameko               | Karp, Jordan           |
| Byrd, DeAnnah        | Demirer, Ibrahim      | Hamilton, Lucas                | Kim, Kyungmin          |
| Candrian, Carey      | Denier, Nicole        | Hamm, Jeremy                   | Kim, Steffi M          |
| Carpenter, Brian     | Devitt, Alea          | Han, Sae Hwang                 | Kirwan, Brock          |
| Carvalho, Janessa    | Diaz-Galvan, Patricia | Hand, Christopher              | Klaiber, Patrick       |
| Casaletto, Kaitlin   | Diehl, Manfred        | Harrington, Karra              | Klusmann, Verena       |
| Caskie, Grace        | Doumas, Michail       | Hawkley, Louise                | Knoff, Aubrey          |
| Cassidy, Brittany    | Duarte, Audrey        | Heckhausen, Jutta              | Knoll, Nina            |
| Castel, Alan         | Dunsmore, Victoria    | Henkens, Kene                  | Kobayashi-Cuya, Kimi   |
| Cavallini, Elena     | Dupuy, Emma           | Henning, Georg                 | Koffer, Rachel         |
| Cedres, Nira         | Earhart, Gammon       |                                | Köhncke, Ylva          |

|                      |                                |                               |                         |
|----------------------|--------------------------------|-------------------------------|-------------------------|
| Kornadt, Anna        | Munoz, Elizabeth               | Sacca, Valeria                | Turiano, Nicholas       |
| Kotter-Gruehn, Dana  | Nakagomi, Atsushi              | Sadeqi, Farima                | Turner, Shelbie         |
| Kousaie, Shanna      | Nehrkorn-Bailey, Abigail       | Salter, Phia                  | Van Bogart, Karina      |
| Kuhlmann, Beatrice   | Nelson, Niccole                | Sandoval Obando, Eduardo      | van der Wardt, Veronika |
| Laditka, Sarah       | Nemoto, Yuta                   | Sardina, Angela               | Van Gemmert, Arend      |
| Lamar, Melissa       | Nicholson, Jody                | Sauzéon, Hélène               | Vannucci, Manila        |
| Lange-Maia, Brittney | Nikitin, Jana                  | Sayed, Linda                  | Verhaeghen, Paul        |
| Lawrence, Jourdyn    | O'Brien, Erica                 | Schaefer, Stacey M.           | Vicerra, Paolo Miguel   |
| Leanage, Allison     | Ogle, Destiny                  | Schönstein, Anton             | Manalang                |
| Lee, Gina            | Okubo, Yoshi                   | Schweizer, Karl               | Vogel, Mia              |
| Lee, Kang            | Ong, Anthony D.                | Scott, Stacey                 | Wahl, Hans-Werner       |
| Lee, Lewina          | O'Rourke, Norm                 | Seaman, Kendra                | Waite, Linda            |
| Lee, Soomi           | O'Suilleabháin, Páraic         | Segel-Karpas, Dikla           | Waldthaler, Josefine    |
| Lee, Sunghée         | Paitel, Elizabeth              | Sergio, Lauren                | Wang, Kaipeng           |
| Leibel, Daniel       | Pavlova, Maria                 | Shoenfelt, Alayna             | Weisenbach, Sara        |
| Lewthwaite, Rebecca  | Pehlivanoglu, Didem            | Shrira, Amit                  | Weiss, David            |
| Li, Karen            | Pfenninger, Simone             | Siedlecki, Karen              | West, John              |
| Li, Shihua           | Pfund, Gabrielle               | Siew, Savannah                | Wettstein, Markus       |
| Liampas, Ioannis     | Phillips, Christine            | Sims Wright, Regina           | Whisman, Mark           |
| Lichtenberg, Peter   | Phillips, Louise               | Small, Brent                  | Wieck, Cornelia         |
| Lieu, Kevin          | Pichora-Fuller, M.<br>Kathleen | Smith, Dylan                  | Wiegand, Iris           |
| Lin, Zhixuan         | Pishdadian, Sara               | Song, Jieun                   | Wilson, Robert          |
| Lin, Zhiyong         | Poe, Abigail                   | Sörensen, Silvia              | Wilson, Stephanie       |
| Lisa J., Klasen      | Puga, Frank                    | Spaniol, Julia                | Windsor, Tim            |
| Liu, Zuyun           | Qi, Xiang                      | Sprague, Briana               | Wood, Stacey            |
| Löckenhoff, Corinna  | Rabin, Laura                   | Stawski, Robert               | Wynn, Jordana           |
| Luchetti, Martina    | Raj, Minakshi                  | Steltenpohl Young,<br>Crystal | Xie, Weizhen            |
| Luong, Gloria        | Rauer, Amy                     | Stephan, Yannick              | Xing, Cai               |
| Lyons, Karen         | Rebok, George                  | Sterns, Harvey                | Yeung, Dannii           |
| Marcus, Justin       | Riediger, Michaela             | Stine-Morrow, Elizabeth       | Yorgason, Jeremy        |
| Martin, Chris        | Ristl, Christina               | Strough, JoNell               | Yow, W. Quin            |
| Martire, Lynn        | Robbins, Michael               | Suitor, J. Jill               | Yu, Junhong             |
| Mathis, Arlesia      | Robbins-Panko, Jessica         | Sun, Fei                      | Zacher, Meghan          |
| Maxfield, Molly      | Robitaille, Annie              | Sutin, Angelina               | Zahodne, Laura          |
| Meade, Melissa       | Roecke, Christina              | Tang, Tan                     | Zambrano, Elizabeth     |
| Mejía, Shannon       | Romeiser, Jamie                | Taylor, Robert                | Zammit, Andrea          |
| Mienaltowski, Andrew | Rook, Karen                    | Taylor, Zachary               | Zhang, Hanyu            |
| Mogle, Jacqueline    | Rose, Karen                    | Terracciano, Antonio          | Zhang, Shenghao         |
| Molde, Helge         | Rothermund, Klaus              | Thakral, Preston              | Zhang, Yun              |
| Monin, Joan          | Ruben, Mollie                  | Thierry, Amy                  | Zhou, Jiansong          |
| Montepare, Joann     | Ruffman, Ted                   | Thunell, Johanna              | Zhou, Junhong           |
| Moretti, Luca        | Rupprecht, Fiona               | Toh, Wei Xing (Noah)          | Zhou, Yuanjin           |
| Mroz, Emily          | Saajanaho, Milla               | Torres, Lucas                 | Zhou, Zi                |
| Mu, Christina        | Sabatini, Serena               | Touron, Dayna                 | Zhu, Yiyi               |
| Muffato, Veronica    |                                |                               | Zissimopoulos, Julie    |
